# Supplementary material for: Synthetic and thermal studies of four insensitive energetic materials based on oxidation of the melamine structure
Source: Royal Society of Chemistry journal article supplement (doi:10.1039/d0ra09105g), 2020-12-23
Supplement: d0ra09105g1.pdf [file d0ra09105g1.pdf]

## Supporting Information

### **Synthetic and thermal studies of insensitive energetic materials based on oxidation of melamine structure**

Jiarong Zhang<sup>a, c</sup>, Fuqiang Bi<sup>\*b, c</sup>, Junlin Zhang<sup>c</sup>, Xiaohong Wang<sup>c</sup>, Zhi Yang<sup>a</sup>,  
Guofang Zhang<sup>b</sup>, Bozhou Wang<sup>\*c</sup>

<sup>a</sup>. School of Chemistry and Chemical Engineering, Beijing Institute of Technology, Beijing, 100081, PR  
China

<sup>b</sup>. Key Laboratory of Applied Surface and Colloid Chemistry, MOE / School of Chemistry and Chemical  
Engineering, Shaanxi Normal University, Xi'an 710062, PR China

<sup>c</sup>. State Key Laboratory of Fluorine & Nitrogen Chemicals, Xi'an Modern Chemistry Research Institute,  
Xi'an 710065, PR China

Corresponding authors

Prof. Bozhou Wang

E-mail address: [wbz600@163.com](mailto:wbz600@163.com)

Dr. Fuqiang Bi

E-mail address: [bifuqiang@gmail.com](mailto:bifuqiang@gmail.com)

## **Contents**

**Page S3 Crystallographic data, hydrogen bonds and Crystal structure**

**Page S8 NMR spectra**

**Page S12 IR spectra**

**Page S14 Sample images**

## Crystallographic data

### The apparatus and conditions of crystal structure determination

A single crystal of MDO·4H<sub>2</sub>O suitable for X-ray diffraction analysis was prepared by slow evaporation of H<sub>2</sub>O solvent at room temperature. A colorless crystal with dimension of 0.34×0.26×0.15 mm was selected for X-ray single crystal diffraction analysis. The diffraction data were collected on a BRUKER SMART Apex II CCD X-ray diffractometer equipped with a Mo K $\alpha$  radiation ( $\lambda=0.71073$  Å) using an  $\omega$ - $\theta$  scan mode at 153(2) K. A total of 10161 reflections were obtained in the range of  $3.19 \leq \theta \leq 25.09^\circ$ , of which 1764 were independent ( $R_{\text{int}}=0.0280$ ) were considered to be observed and used for the refinement. The structure was solved by direct methods and refined by full-matrix least-squares techniques on  $F^2$  using SHELES-97 and SHELXL-97 programs. A full-matrix least-squares refinement gave the final  $R_1=0.0297$  and  $\omega R_2=0.0796$  ( $\omega=1/[\sigma^2(F_0^2) + (0.0270 P)^2 + 0.0000 P]$ , where  $P=(F_0^2+2F_c^2)/3$ ). The goodness-of-fit on  $F^2$  is 1.058. The largest difference peak and hole were 0.252 and -0.191 e/Å<sup>3</sup>

**Table S1.** Crystal data and structure refinement parameters for MDO·4H<sub>2</sub>O

| Compound           | MDO·4H <sub>2</sub> O                                        |
|--------------------|--------------------------------------------------------------|
| Empirical formula  | C <sub>3</sub> H <sub>14</sub> N <sub>6</sub> O <sub>6</sub> |
| Molar mass (g/mol) | 230.20                                                       |
| Temperature (K)    | 153(2)                                                       |
| Crystal system     | Monoclinic                                                   |
| Space group        | <i>P</i> 2(1)/n                                              |
| Crystal size (mm)  | 0.34 x 0.26 x 0.15                                           |
| <i>a</i> (Å)       | 8.923(2)                                                     |
| <i>b</i> (Å)       | 6.9505(18)                                                   |
| <i>c</i> (Å)       | 16.162(4)                                                    |
| $\alpha$ (°)       | 114.227(6)                                                   |
| $\beta$ (°)        | 94.259(9)                                                    |

|                                                       |                |
|-------------------------------------------------------|----------------|
| $\gamma$ (°)                                          | 107.386(6)     |
| $V$ (Å <sup>3</sup> )                                 | 999.6(4)       |
| $Z$                                                   | 4              |
| $h$                                                   | -10 ≤ $h$ ≤ 10 |
| $k$                                                   | -8 ≤ $k$ ≤ 8   |
| $l$                                                   | -19 ≤ $l$ ≤ 19 |
| $D_c$ (g/cm <sup>3</sup> )                            | 1.530          |
| $\lambda$ (Å)                                         | 0.71073        |
| $\mu$ (Mo K) (mm <sup>-1</sup> )                      | 0.142          |
| $F(0\ 0\ 0)$                                          | 488            |
| $\theta$ range (°)                                    | 3.19-25.09     |
| Measured reflections                                  | 10161          |
| Unique data ( $R_{int}$ )                             | 1764 (0.0280)  |
| $R1, wR2$ [ $I > 2\sigma(I)$ ]                        | 0.0297, 0.0796 |
| $R1, wR2$ (all data)                                  | 0.0313, 0.0810 |
| Goodness-of-fit                                       | 1.058          |
| $\delta p_{max}, \delta p_{min}$ (e/ Å <sup>3</sup> ) | 0.252, -0.191  |
| CCDC number                                           | 1947761        |

**Table S2.** Selected bond lengths (Å) and bond angles (°) of MDO·4H<sub>2</sub>O.

| Bond       | Dist.      | Bond       | Dist.      |
|------------|------------|------------|------------|
| N(1)-C(1)  | 1.2993(16) | N(1)-H(1A) | 0.8800     |
| N(1)-H(1B) | 0.8800     | N(2)-O(1)  | 1.3516(13) |
| N(2)-C(1)  | 1.3558(16) | N(2)-C(2)  | 1.3651(16) |
| N(3)-C(2)  | 1.3218(16) | N(3)-H(3A) | 0.8800     |
| N(3)-H(3B) | 0.8800     | N(4)-C(2)  | 1.3343(16) |
| N(4)-C(3)  | 1.3414(16) | N(5)-C(3)  | 1.3120(16) |
| N(5)-H(5A) | 0.8800     | N(5)-H(5B) | 0.8800     |
| N(6)-C(1)  | 1.3516(16) | N(6)-O(2)  | 1.3622(13) |
| N(6)-C(3)  | 1.3682(16) | O(3)-H(3C) | 0.828(9)   |
| O(3)-H(3D) | 0.827(9)   | O(4)-H(4C) | 0.820(10)  |
| O(4)-H(4D) | 0.829(10)  | O(5)-H(5C) | 0.833(9)   |
| O(5)-H(5D) | 0.834(10)  | O(6)-H(6C) | 0.823(10)  |

|                  |            |                  |            |
|------------------|------------|------------------|------------|
| O(6)-H(6D)       | 0.841(9)   |                  |            |
| Angle            | (°)        | Angle            | (°)        |
| C(1)-N(1)-H(1A)  | 120.0      | C(1)-N(1)-H(1B)  | 120.0      |
| H(1A)-N(1)-H(1B) | 120.0      | O(1)-N(2)-C(1)   | 118.36(10) |
| O(1)-N(2)-C(2)   | 120.35(10) | C(1)-N(2)-C(2)   | 121.29(10) |
| C(2)-N(3)-H(3A)  | 120.0      | C(2)-N(3)-H(3B)  | 120.0      |
| H(3A)-N(3)-H(3B) | 120.0      | C(2)-N(4)-C(3)   | 118.03(10) |
| C(3)-N(5)-H(5A)  | 120.0      | C(3)-N(5)-H(5B)  | 120.0      |
| H(5A)-N(5)-H(5B) | 120.0      | C(1)-N(6)-O(2)   | 118.44(10) |
| C(1)-N(6)-C(3)   | 120.34(10) | O(2)-N(6)-C(3)   | 121.13(10) |
| H(3C)-O(3)-H(3D) | 107.6(19)  | H(4C)-O(4)-H(4D) | 108.7(19)  |
| H(5C)-O(5)-H(5D) | 102.3(19)  | H(6C)-O(6)-H(6D) | 107(2)     |
| N(1)-C(1)-N(6)   | 121.22(11) | N(1)-C(1)-N(2)   | 121.31(11) |
| N(6)-C(1)-N(2)   | 117.47(11) | N(3)-C(2)-N(4)   | 122.28(11) |
| N(3)-C(2)-N(2)   | 116.73(11) | N(4)-C(2)-N(2)   | 121.00(11) |
| N(5)-C(3)-N(4)   | 22.03(11)  | N(5)-C(3)-N(6)   | 116.22(11) |
| N(4)-C(3)-N(6)   | 121.74(11) |                  |            |

**Table S3.** Hydrogen bond lengths (Å) and bond angles (°) of MDO·4H<sub>2</sub>O

| D-H...A     | d(D-H) (Å) | d(H...A) (Å) | d(D...A) (Å) | ∠DHA(°) |
|-------------|------------|--------------|--------------|---------|
| N1-H1A...O5 | 0.880      | 1.969        | 2.792        | 155.01  |
| N1-H1B...O4 | 0.880      | 2.059        | 2.844        | 148.17  |
| N3-H3A...O4 | 0.880      | 2.085        | 2.890        | 151.76  |
| N3-H3B...O3 | 0.880      | 2.210        | 3.043        | 157.62  |
| N5-H5A...O6 | 0.880      | 1.989        | 2.822        | 157.42  |
| N5-H5B...O2 | 0.880      | 2.076        | 2.850        | 146.37  |
| O3-H3C...O2 | 0.828      | 1.989        | 2.815        | 175.77  |
| O4-H4C...O3 | 0.820      | 2.070        | 2.879        | 169.22  |
| O5-H5C...O1 | 0.833      | 1.775        | 2.601        | 170.94  |
| O5-H5C...N2 | 0.833      | 2.614        | 3.410        | 160.50  |
| O6-H6C...O5 | 0.823      | 1.977        | 2.781        | 165.43  |
| O3-H3D...O6 | 0.826      | 2.010        | 2.810        | 163.05  |
| O4-H4D...O2 | 0.829      | 1.955        | 2.779        | 171.90  |
| O4-H4D...N6 | 0.829      | 2.628        | 3.319        | 141.72  |

---

|             |       |       |       |        |
|-------------|-------|-------|-------|--------|
| O5-H5D...N4 | 0.834 | 2.196 | 2.975 | 155.31 |
| O6-H6D...O1 | 0.841 | 1.839 | 2.675 | 172.21 |

---

## X-Ray crystal structure

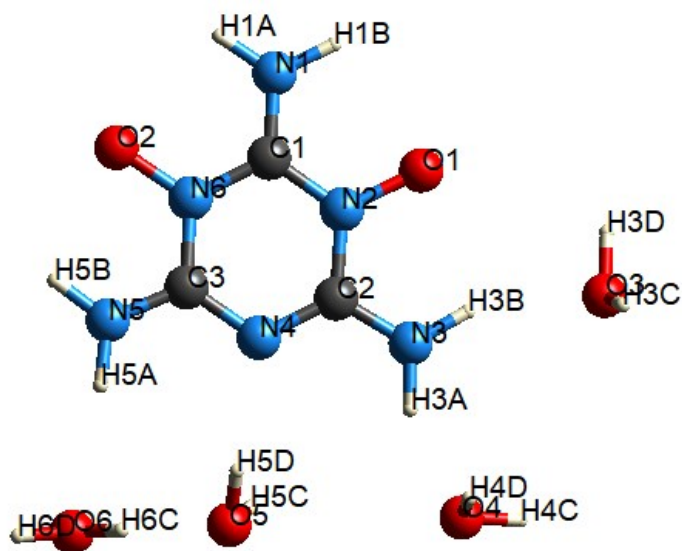

**Figure S1.** The molecular structure of MDO.

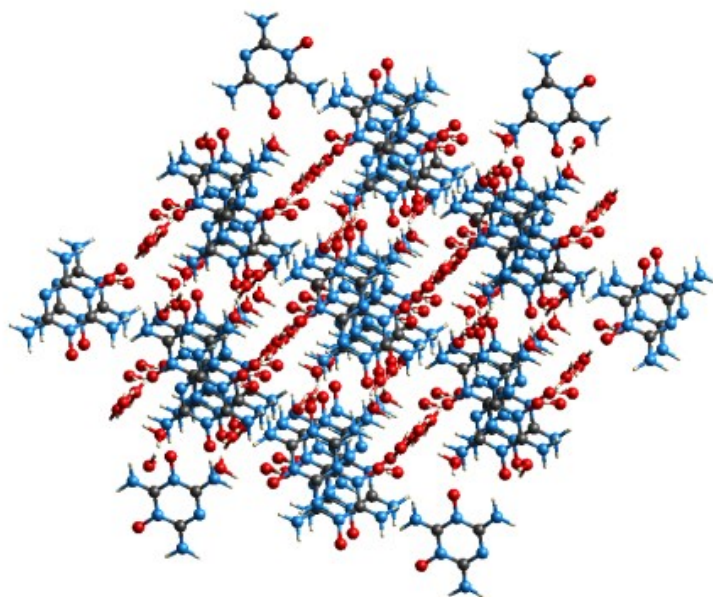

**Figure S2.** The packing diagram of MDO.

## NMR spectra

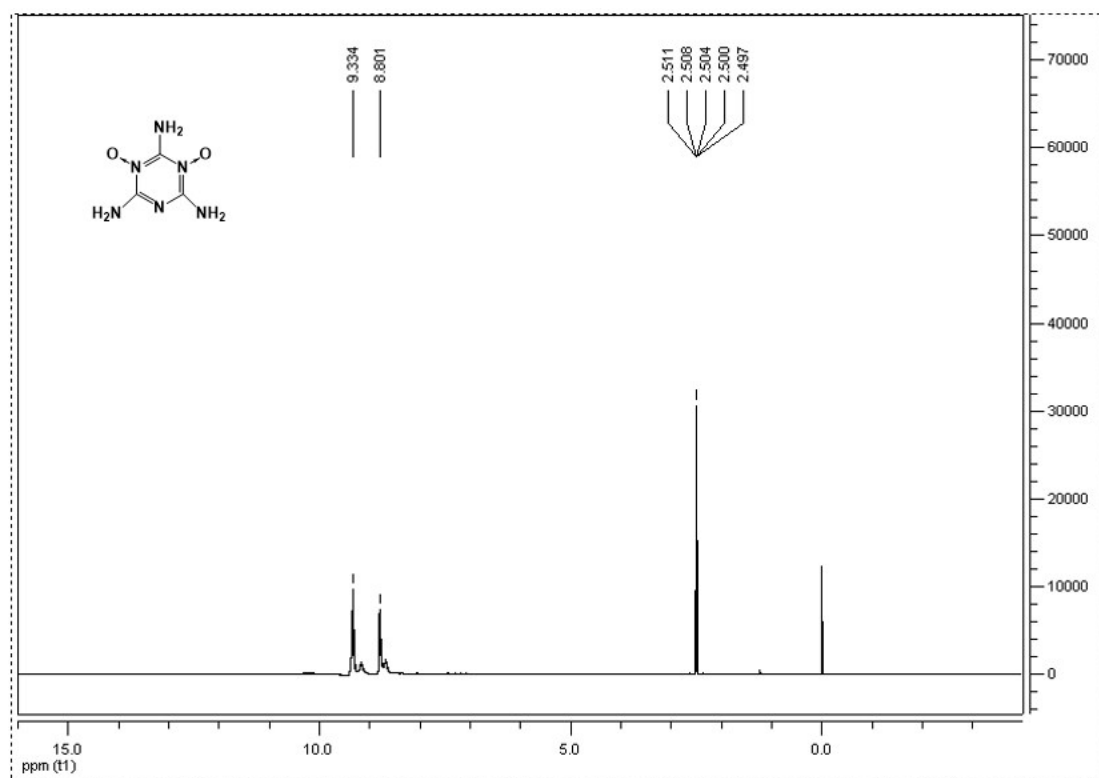

Figure S3. <sup>1</sup>H NMR spectrum of MDO.

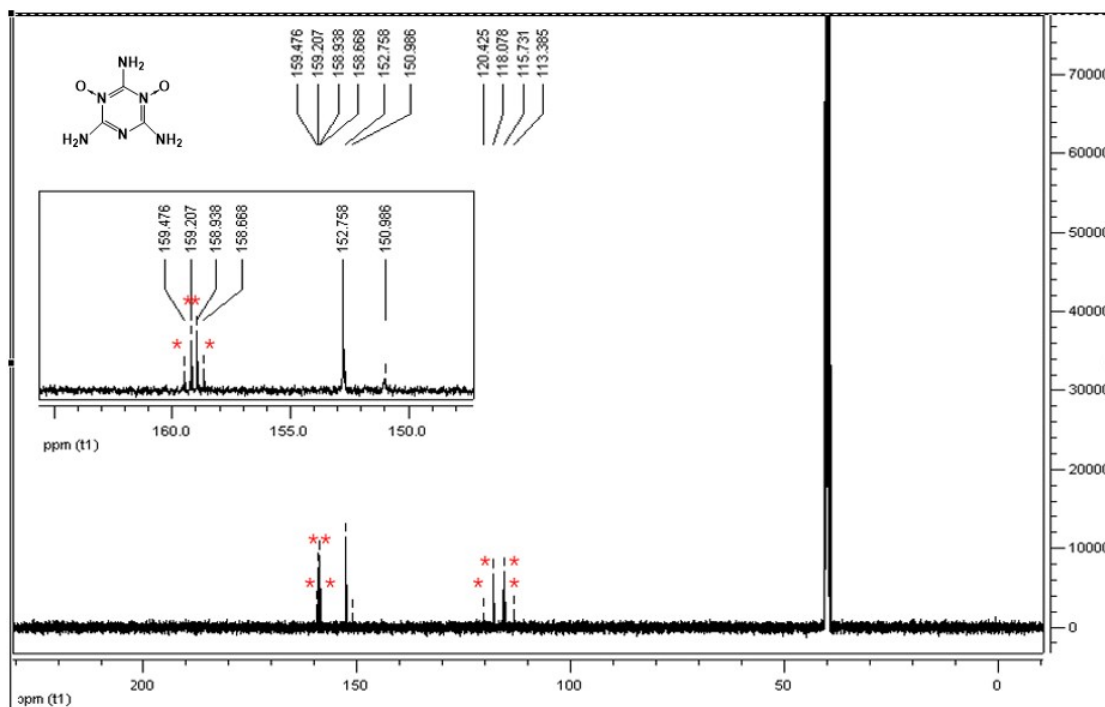

Figure S4. <sup>13</sup>C NMR spectrum of MDO (\* is residual trifluoroacetic acid solvent peak).



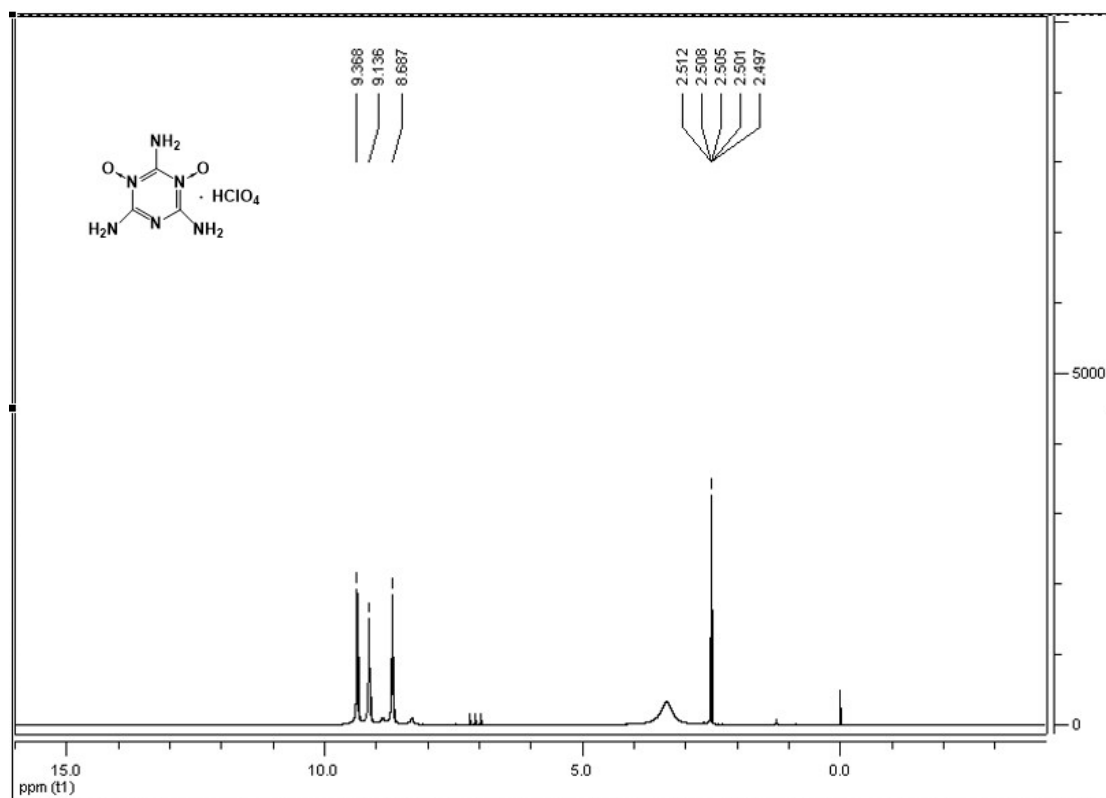

Figure S5.  $^1\text{H}$  NMR spectrum of MDOP.

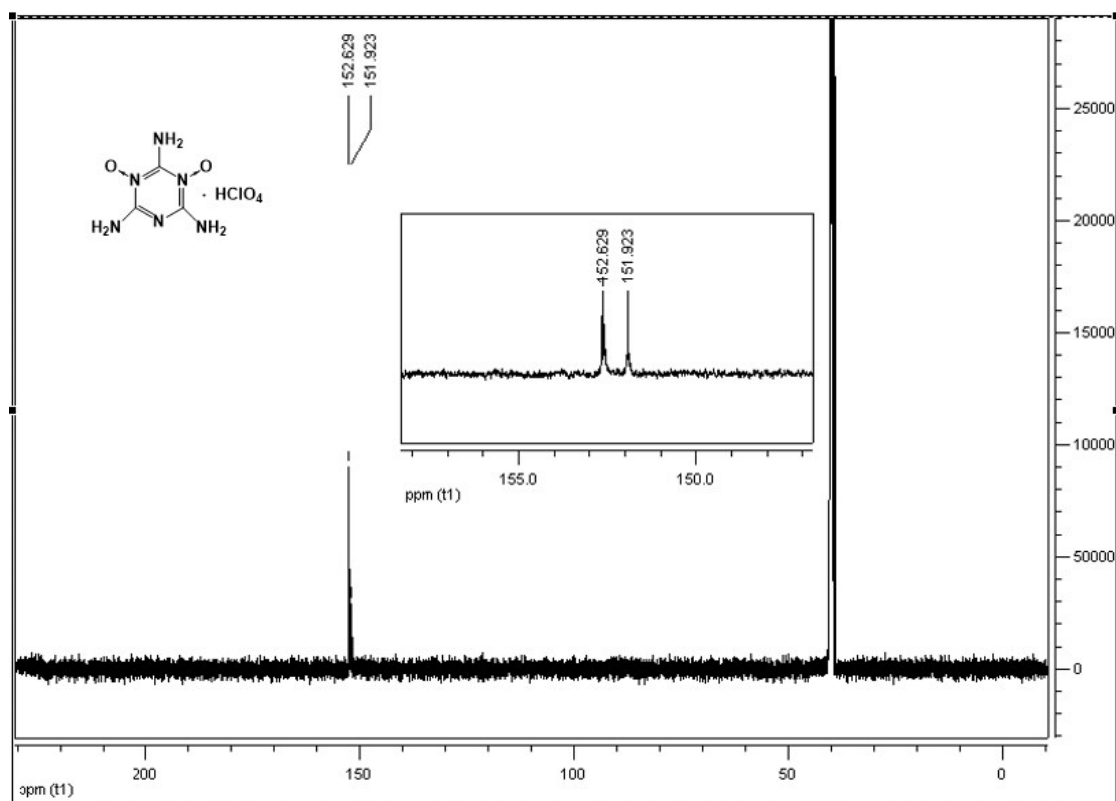

Figure S6.  $^{13}\text{C}$  NMR spectrum of MDOP.

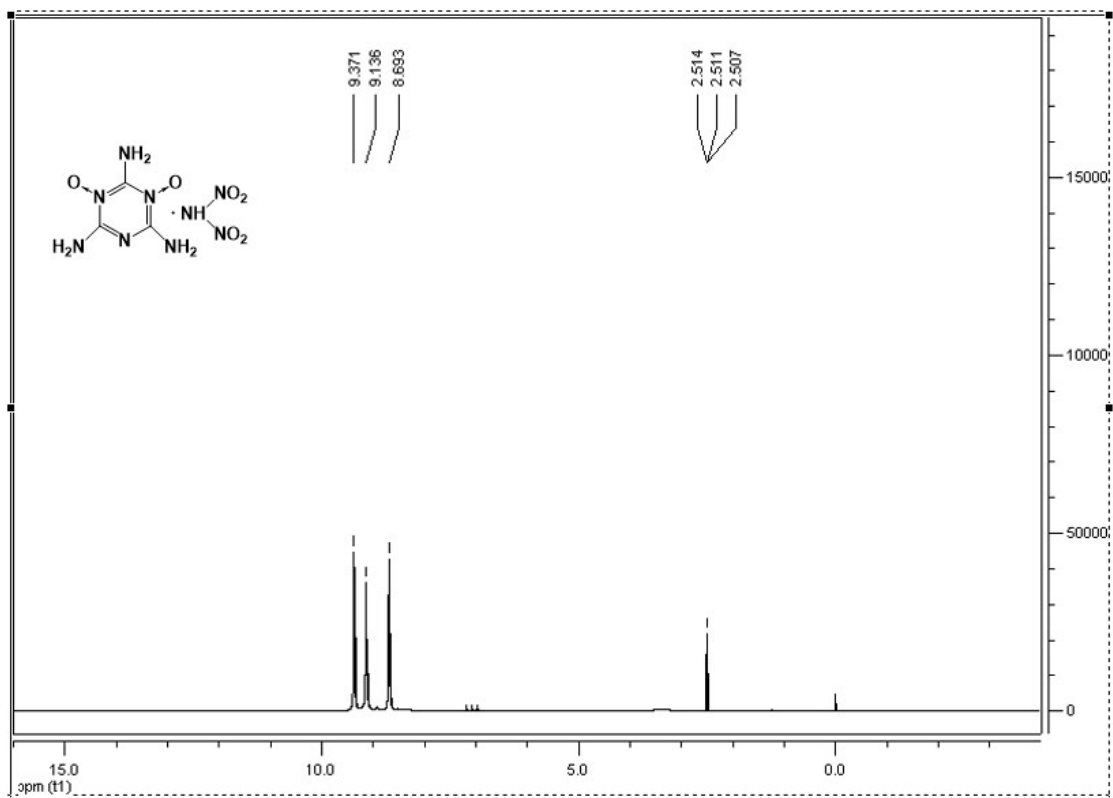

**Figure S7.** <sup>1</sup>H NMR spectrum of MDODA.

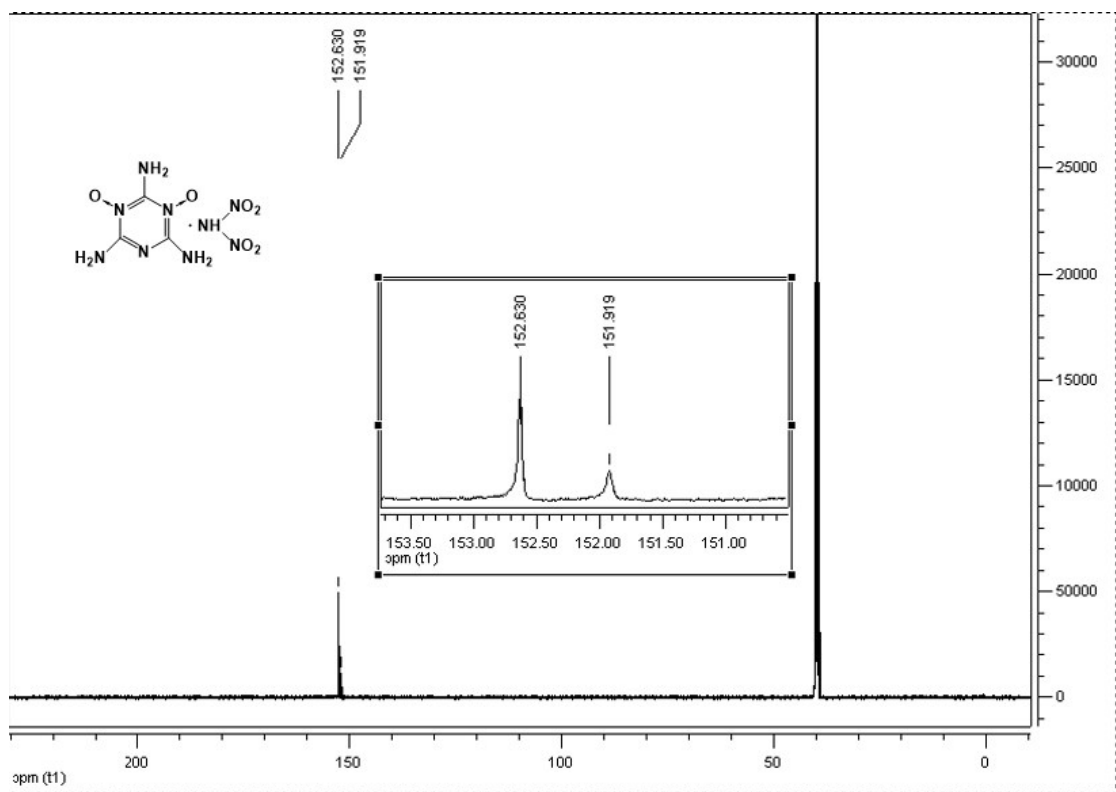

**Figure S8.** <sup>13</sup>C NMR spectrum of MDODA.

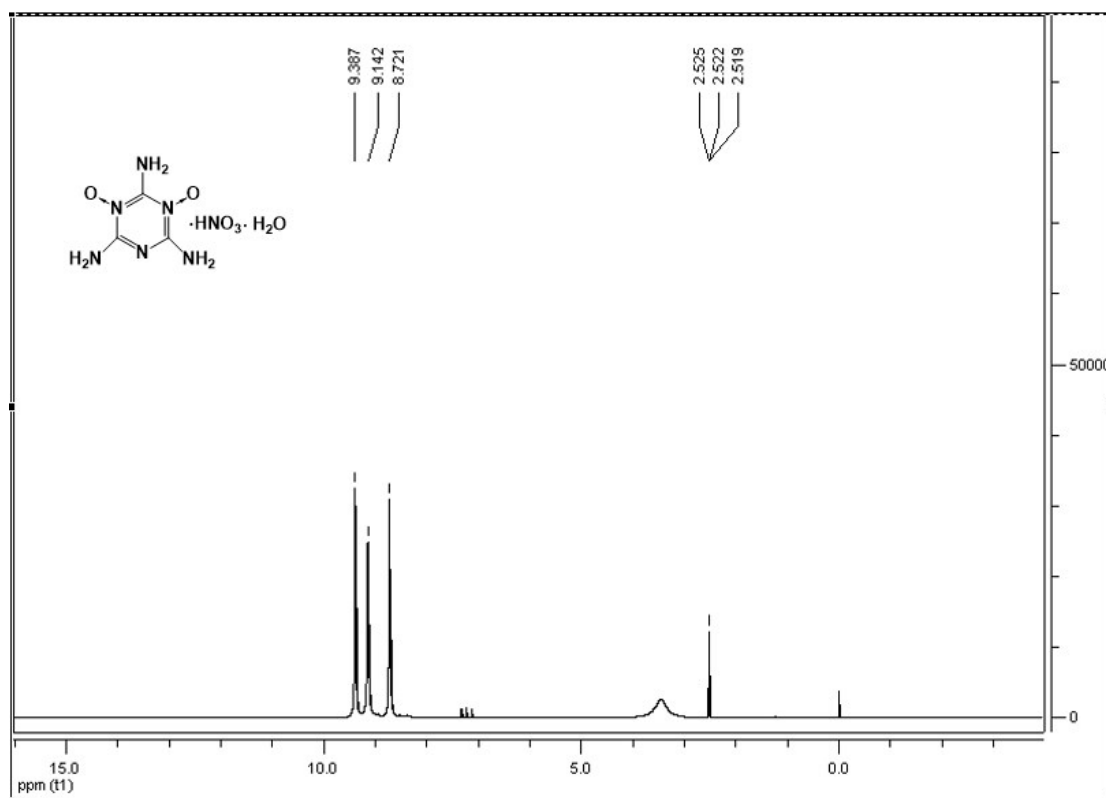

Figure S9. <sup>1</sup>H NMR spectrum of MDOMN.

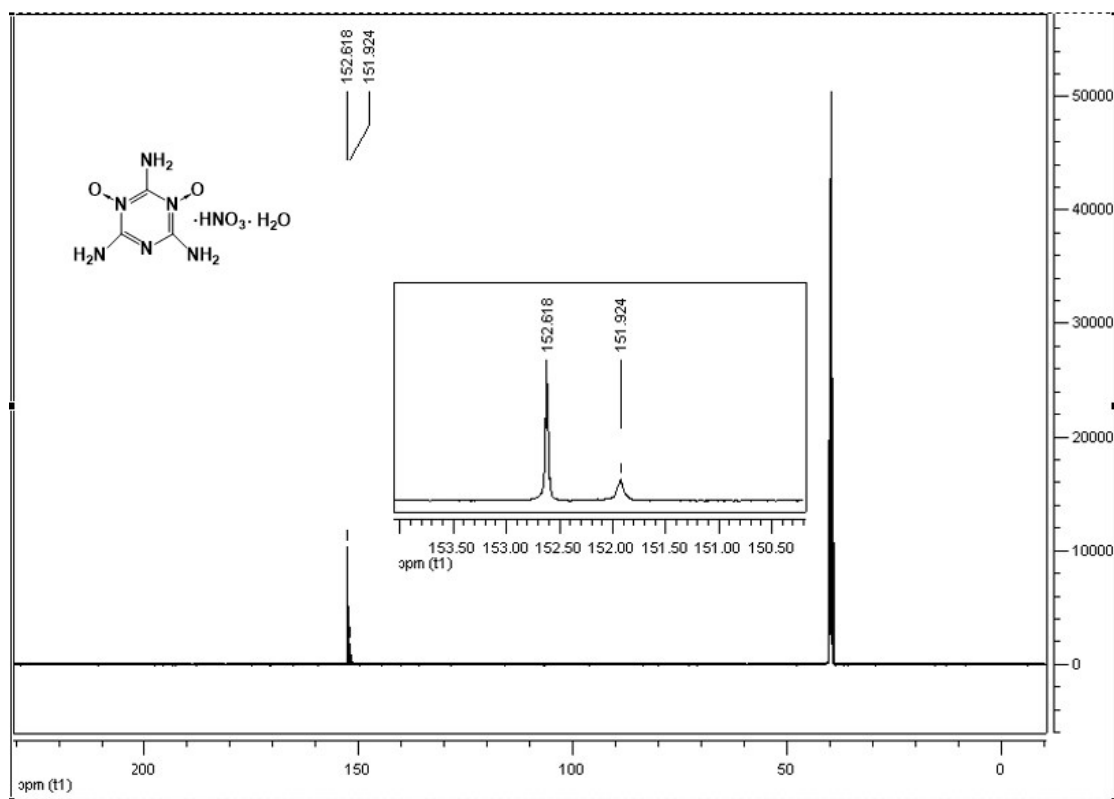

Figure S10. <sup>13</sup>C NMR spectrum of MDOMN.

## IR spectra

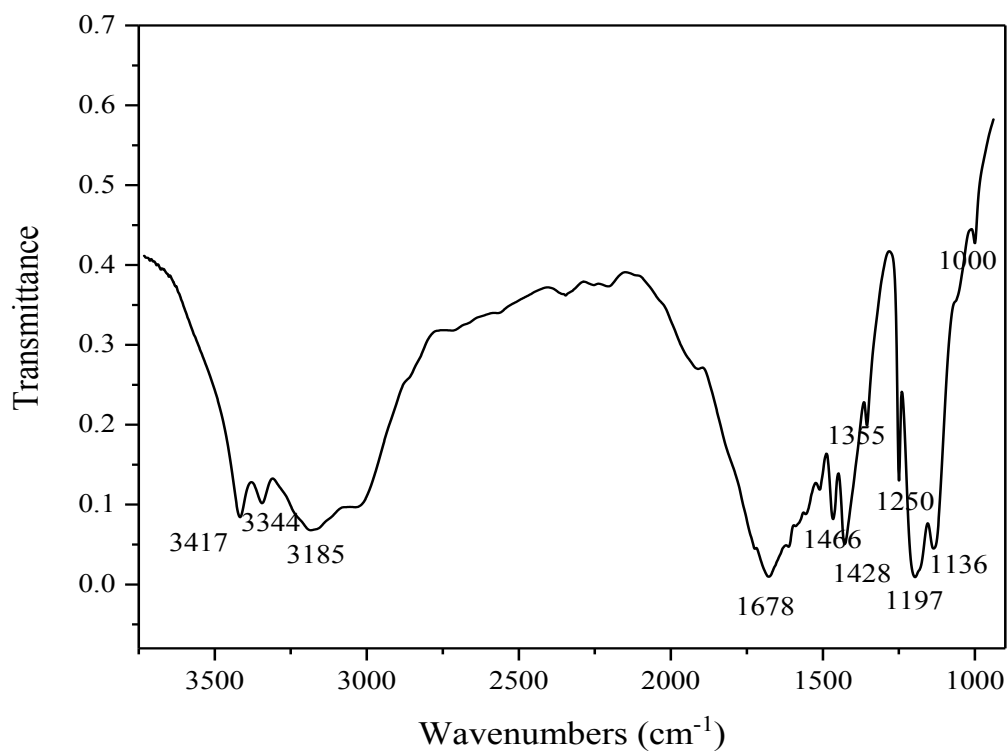

**Figure S11.** IR spectrum of MDO.

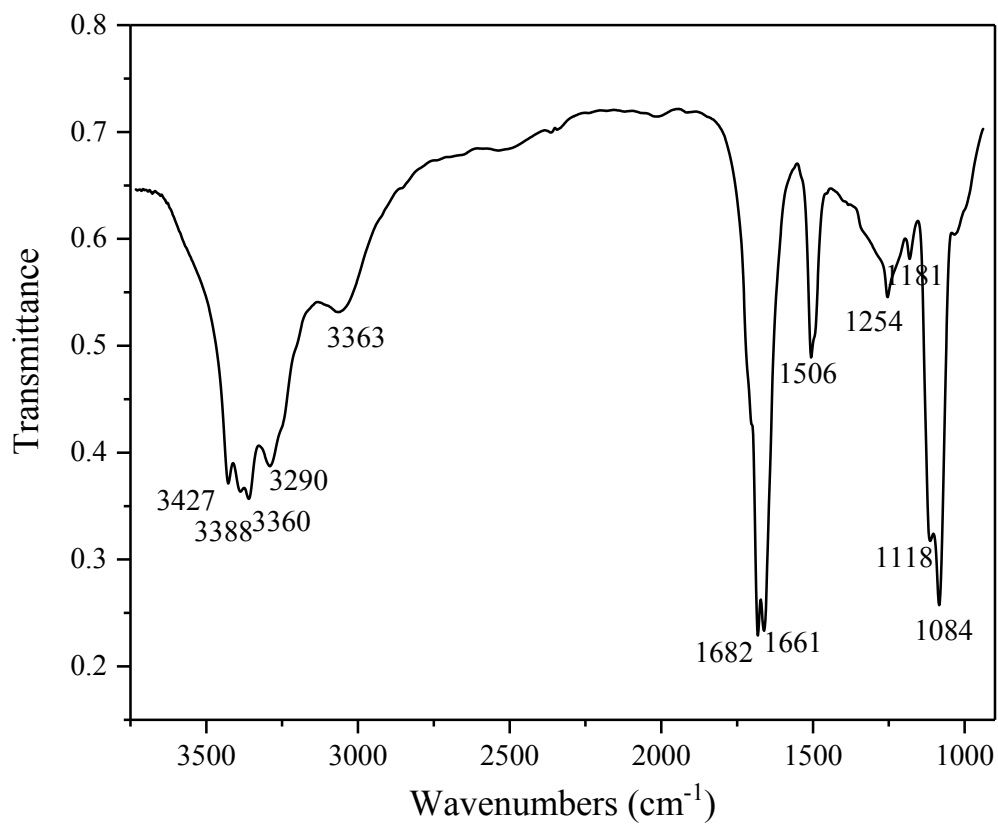

**Figure S12.** IR spectrum of MDOP.

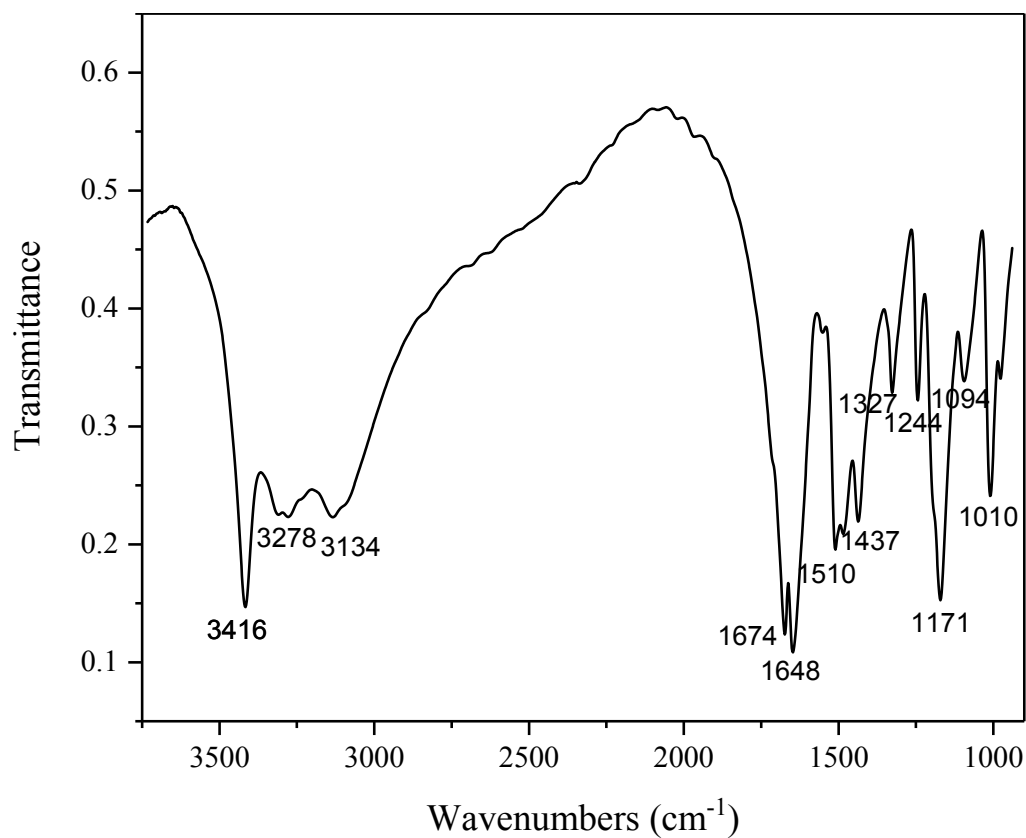

**Figure S13.** IR spectrum of MDODA.

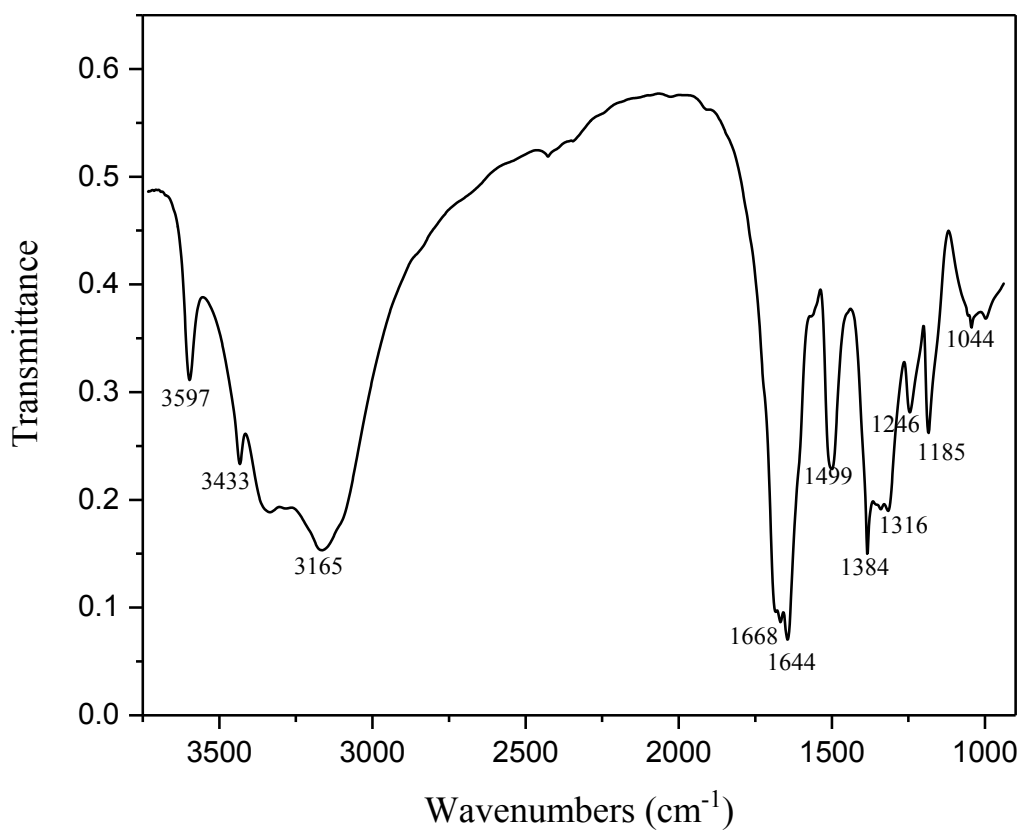

**Figure S14.** IR spectrum of MDOMN.

**Samples images**

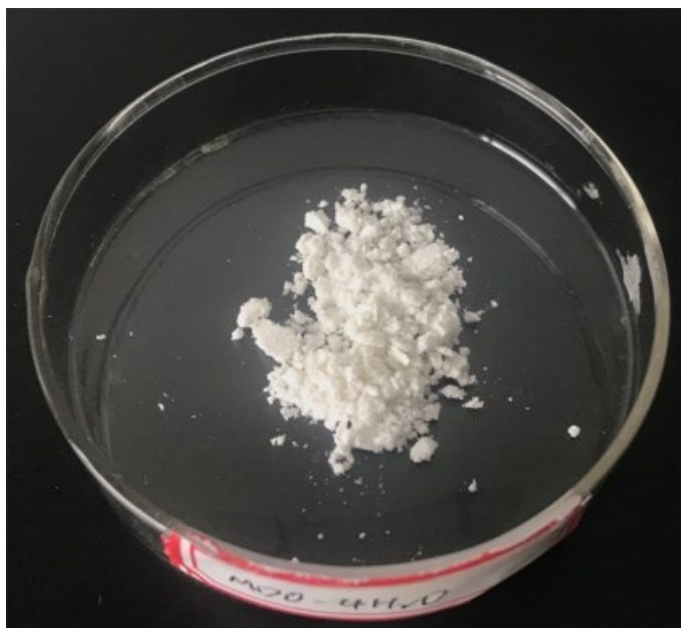

**Figure S15.** MDO sample.

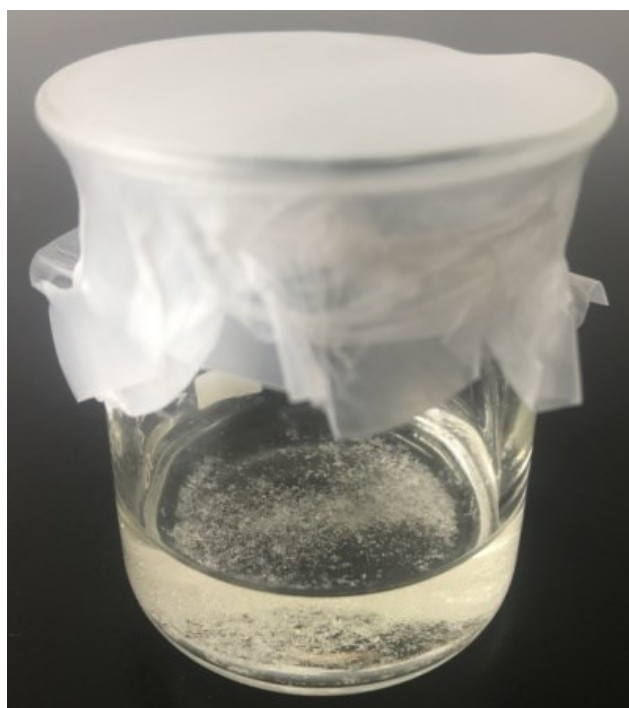

**Figure S16.** MDO crystal sample.
